# Supplementary material for: The E. coli Effector Protein NleF Is a Caspase Inhibitor
Source: PubMed Central journal article supplement (PMC3597564; doi:10.1371/journal.pone.0058937), 2013-03-14
Supplement: pone.0058937.s001.pdf [file pone.0058937.s001.pdf]

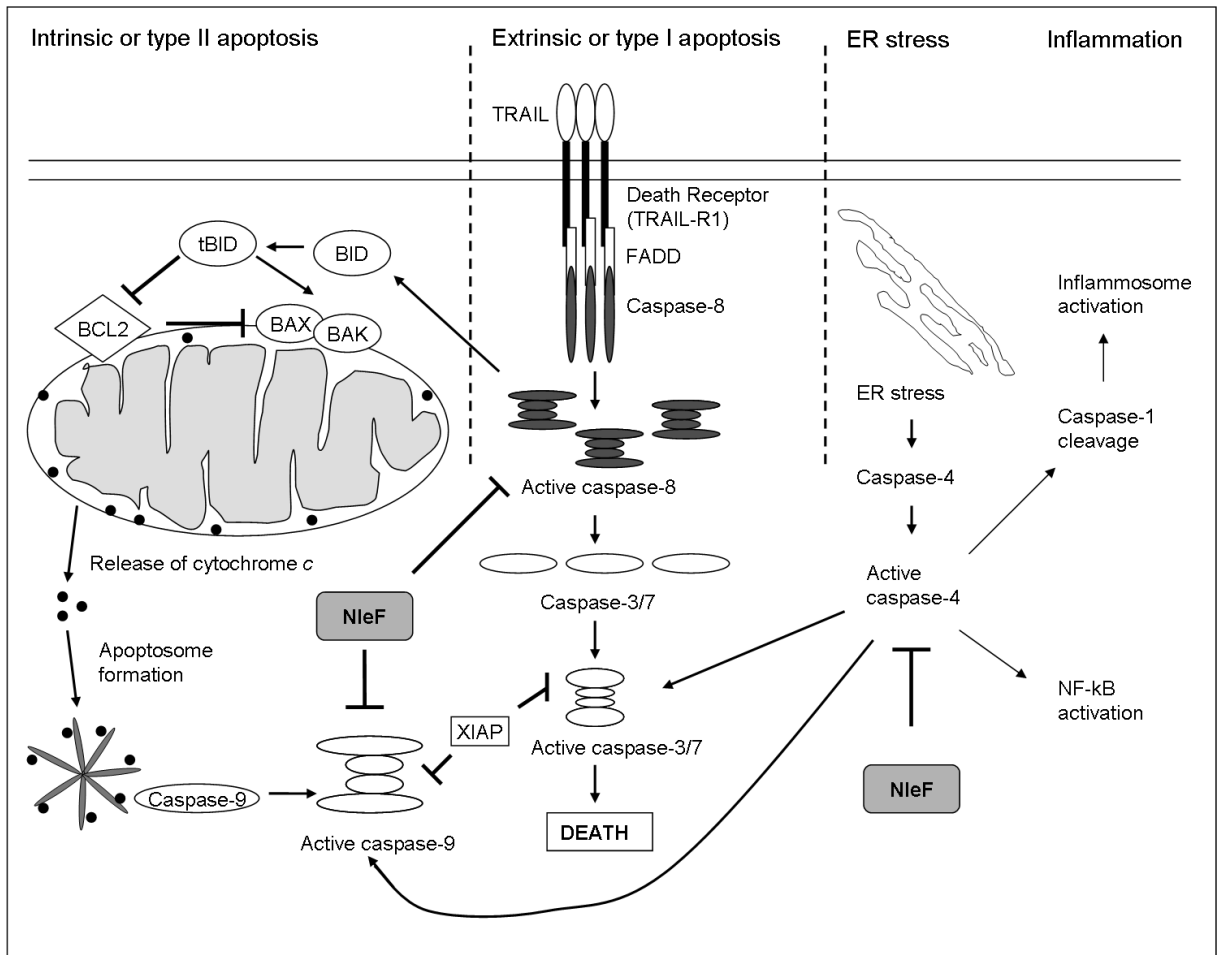

**Figure S1. Interference of NleF with apoptosis signalling.** Abbreviations: **TRAIL**: Tumor necrosis factor Related Apoptosis Inducing Ligand, **FADD**: FAS-Associated protein with Death Domain, **BID**: BH3 interacting domain Death antagonist, **tBID**: truncated BID, **TRAIL-R1**: TRAIL Receptor 1, **ER**: Endoplasmic reticulum. Adapted from [46].
