# Supplementary material for: The E. coli Effector Protein NleF Is a Caspase Inhibitor
Source: PubMed Central journal article supplement (PMC3597564; doi:10.1371/journal.pone.0058937), 2013-03-14
Supplement: pone.0058937.s002.pdf [file pone.0058937.s002.pdf]

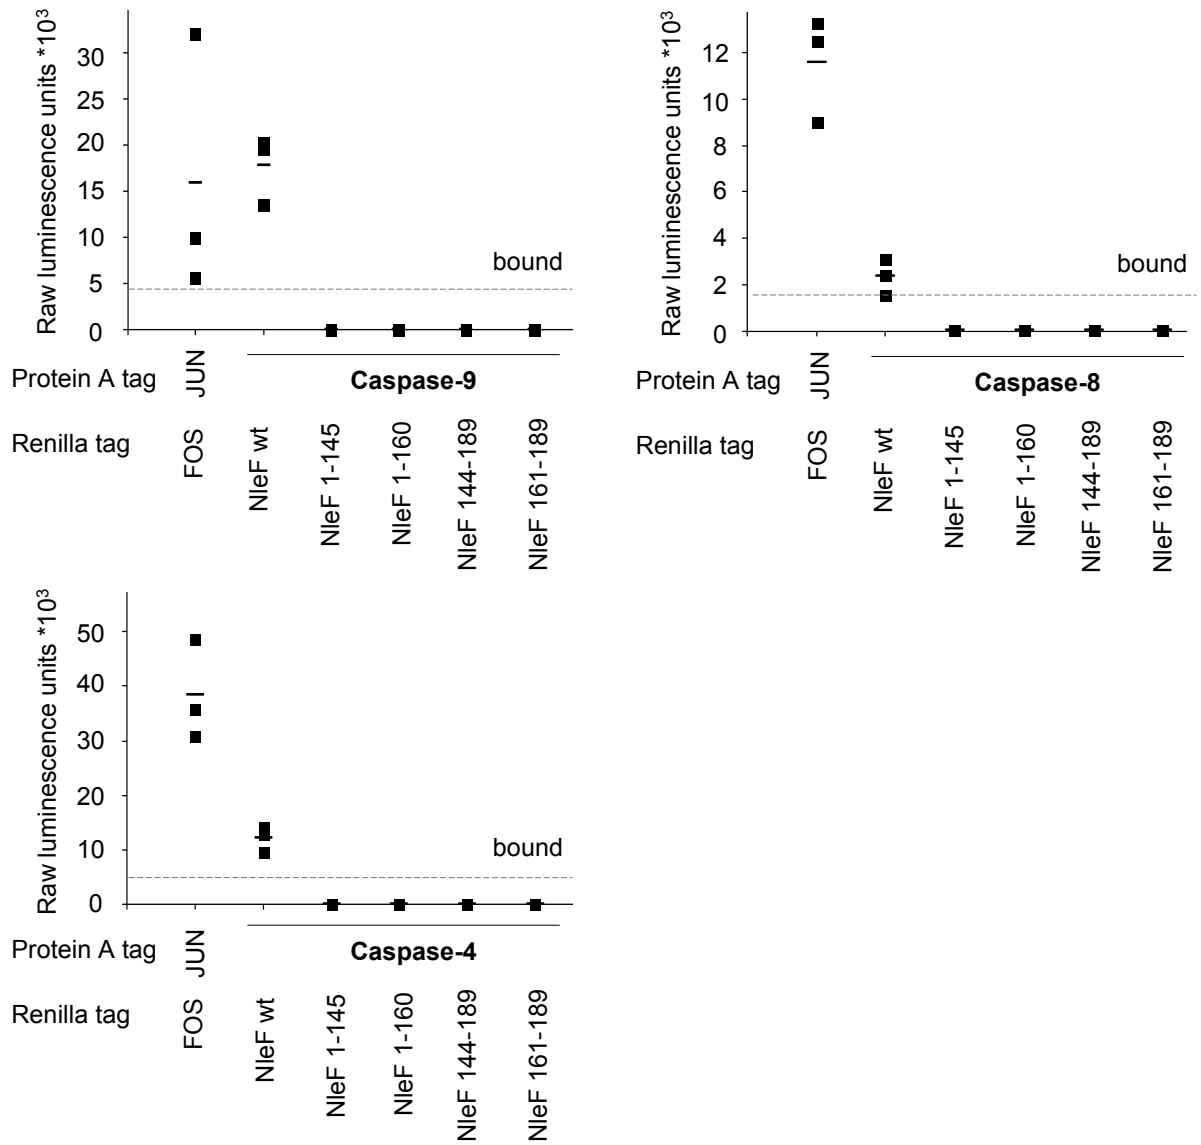

**Figure S2. Interaction of Caspase-9, 8 and 4 with wild type and truncated versions of NleF.** Numbers indicate amino acids present in the deleted versions. wt, wild type (amino acid 1 to 189).
