# Supplementary material for: The E. coli Effector Protein NleF Is a Caspase Inhibitor
Source: PubMed Central journal article supplement (PMC3597564; doi:10.1371/journal.pone.0058937), 2013-03-14
Supplement: pone.0058937.s003.pdf [file pone.0058937.s003.pdf]

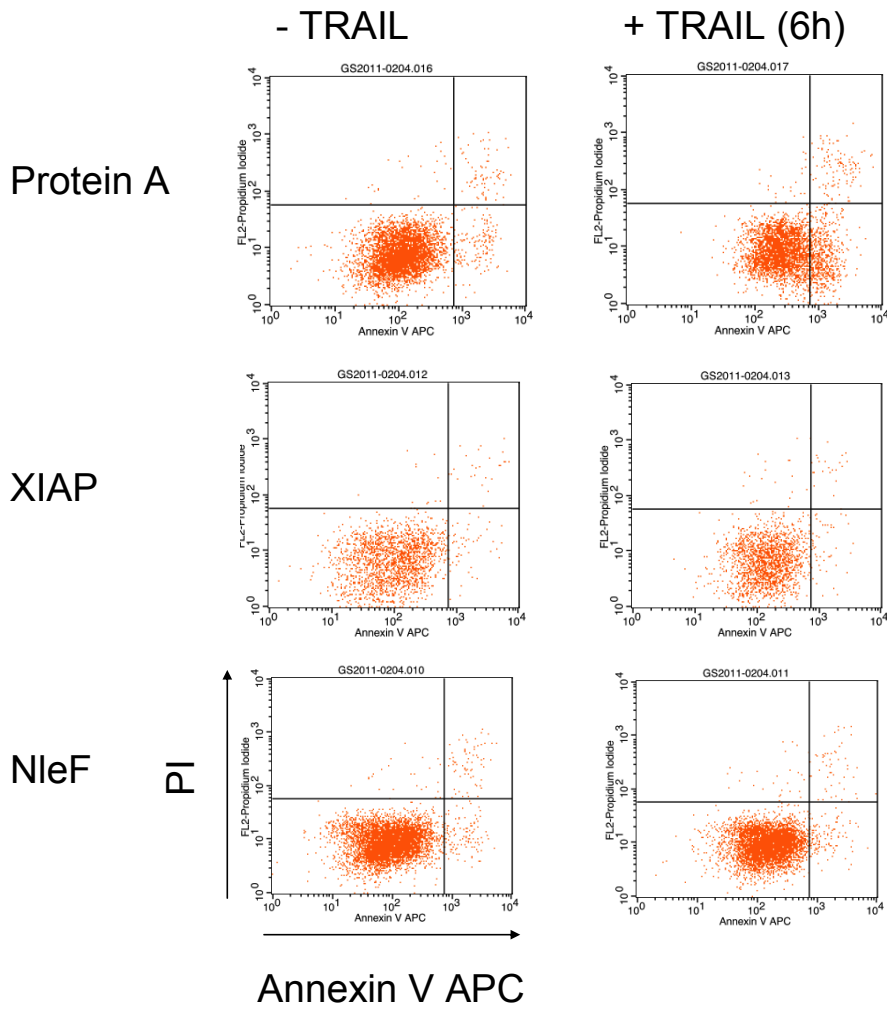

**Figure S3. FACS analysis of wild type NleF in HeLa cells in comparison to Protein A (negative control) and XIAP.** FACS analysis of 10,000 HeLa cells. Apoptosis was induced via TRAIL for 6h. PI: propidium iodide, APC: allophycocyanin.
