# Supplementary material for: The E. coli Effector Protein NleF Is a Caspase Inhibitor
Source: PubMed Central journal article supplement (PMC3597564; doi:10.1371/journal.pone.0058937), 2013-03-14
Supplement: pone.0058937.s004.pdf [file pone.0058937.s004.pdf]

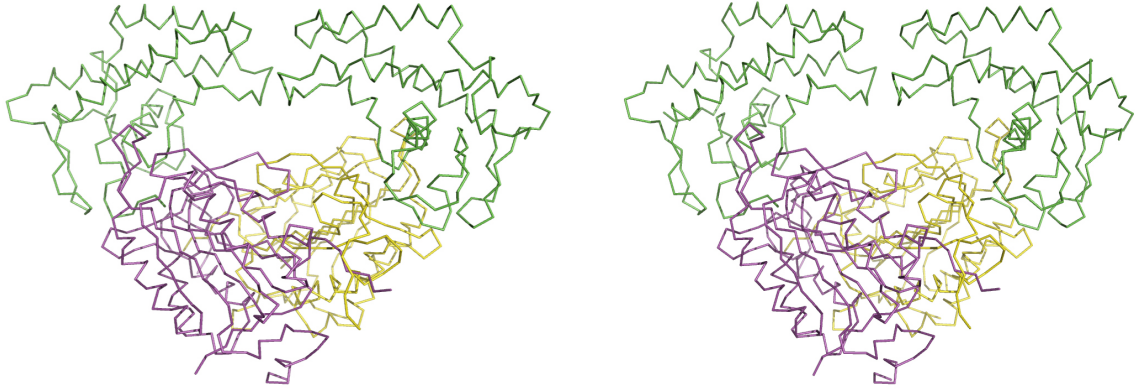

**Figure S4. Stereo structure of the NleF-Caspase-9 complex.**
