# Supplementary material for: The E. coli Effector Protein NleF Is a Caspase Inhibitor
Source: PubMed Central journal article supplement (PMC3597564; doi:10.1371/journal.pone.0058937), 2013-03-14
Supplement: pone.0058937.s005.pdf [file pone.0058937.s005.pdf]

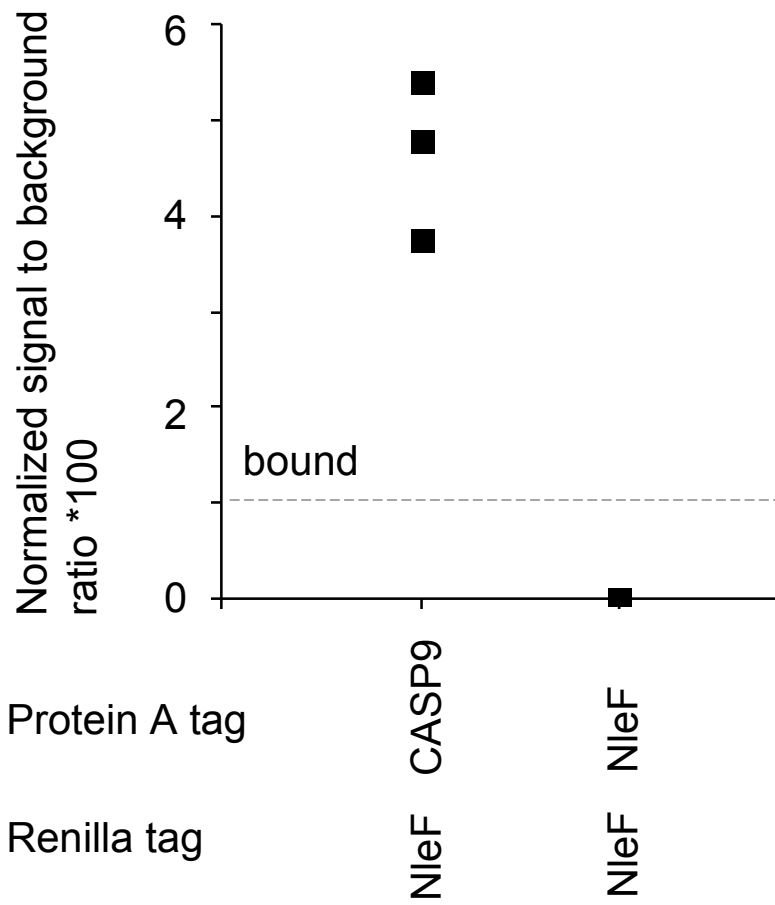

**Figure S5. NleF is not a dimer.** LUMIER assay of NleF against itself and against caspase-9.
