# Supplementary material for: The E. coli Effector Protein NleF Is a Caspase Inhibitor
Source: PubMed Central journal article supplement (PMC3597564; doi:10.1371/journal.pone.0058937), 2013-03-14
Supplement: pone.0058937.s006.pdf [file pone.0058937.s006.pdf]

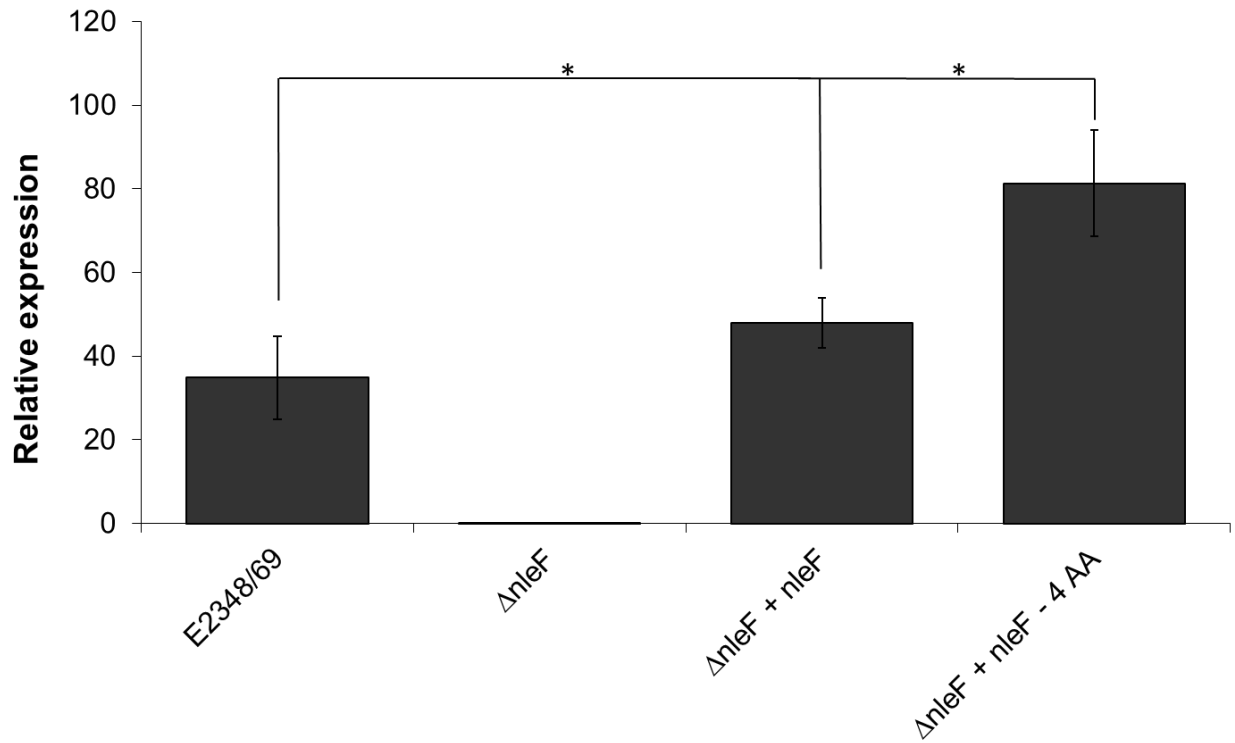

**Figure S6:** Relative expression of *nleF* in cultures activated for 3 hours in DMEM/F12. Strains complemented in single copy,  $\Delta nleF+nleF$  and  $\Delta nleF+nleF-4AA$ , had significantly higher levels of *nleF* expression than the wild type E2348/69 strain. Significance was determined using the two-tailed Wilcoxon test \*  $p \leq 0.05$ .
